# Supplementary material for: Delineating the HMGB1 and HMGB2 interactome in prostate and ovary epithelial cells and its relationship with cancer
Source: PubMed Central journal article supplement (PMC5922377; doi:10.18632/oncotarget.24887), 2018-04-10
Supplement: oncotarget-09-19050-s001.pdf [file oncotarget-09-19050-s001.pdf]

## **Delineating the HMGB1 and HMGB2 interactome in prostate and ovary epithelial cells and its relationship with cancer**

### **SUPPLEMENTARY MATERIALS**

**Supplementary Dataset 1: PNT2 MS Data Analysis of HMGB1 co-immunoprecipitans.** See [Supplementary\\_Dataset\\_1](#)
